# Supplementary material for: Riboflavin deficiency induces a significant change in proteomic profiles in HepG2 cells
Source: PubMed Central journal article supplement (PMC5377456; doi:10.1038/srep45861), 2017-04-03
Supplement: srep45861-s1.pdf [file srep45861-s1.pdf]

# **Riboflavin deficiency induces a significant change in proteomic profiles in HepG2 cells**

Zhonghao Xin<sup>1,2</sup>, Lingling Pu<sup>1</sup>, Weina Gao<sup>1</sup>, Yawen Wang<sup>1,2</sup>, Jingyu Wei<sup>1</sup>, Tala Shi<sup>1</sup>,  
Zhanxin Yao<sup>1</sup> & Changjiang Guo<sup>\*1</sup>

<sup>1</sup>Institute of Health and Environmental Medicine, Tianjin, 300050, China.

<sup>2</sup>School of Public Health, Guangxi Medical University, Nanning, 530021, China.

Correspondence and requests for materials should be addressed to G.CJ. (email:

[guocjtj@126.com](mailto:guocjtj@126.com))

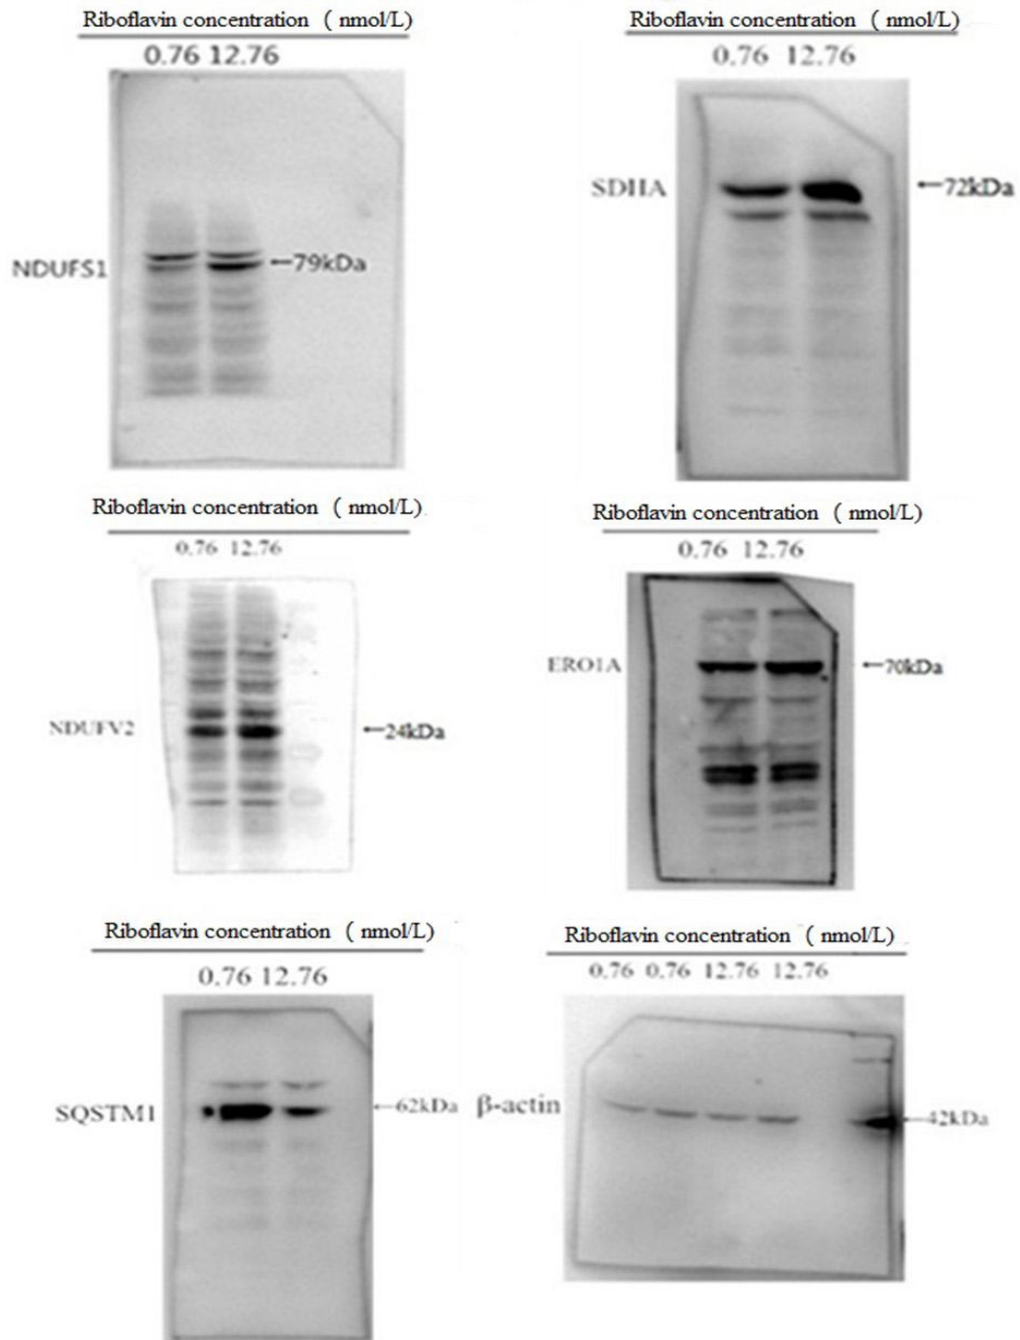

**Supplementary Figure S1. Full-length blots/gels of immunoblotting validation of differentially expressed proteins.**

## **Supplementary detailed characterization of antibodies**

The primary antibodies used included the following: rabbit monoclonal anti-Ndufs1 antibody [EPR11521(B)] (1: 5000; Reacts with: mouse, rat, human; Abcam, USA), rabbit monoclonal anti-SDHA antibody [EPR9043(B)] (1: 2000; Reacts with: mouse, rat, human; Abcam, USA), rabbit monoclonal anti-NDUFV2 antibody [EPR15350(B)] (1: 5000; Reacts with: mouse, rat, human; Abcam, USA), rabbit monoclonal anti-ERO1L antibody [EPR12475(B)] (1: 5000; Reacts with: mouse, rat, human; Abcam, USA), rabbit monoclonal anti-SQSTM1 / p62 antibody [EPR4844] - Autophagosome Marker (1: 5000; Reacts with: mouse, rat, human; Abcam, USA) and mouse monoclonal anti-beta Actin antibody [mAbcam 8226] (1: 2000; Reacts with: mouse, rat, rabbit, horse, chicken, cow, dog, human, pig, zebrafish, african green monkey, chinese hamster, armenian hamster; Abcam, USA). The special secondary antibodies used was Goat Anti-Rabbit IgG H&L (HRP) (1: 10000; Abcam, USA).
